# Supplementary material
Source: PubMed Central journal article supplement (PMC2718552)

Borzuk, et al.

## **Online Data Supplement**

### **Lung Adenocarcinoma Global Profiling**

#### **Identifies Type II TGF- $\beta$ Receptor as a Repressor of Invasiveness**

Alain C. Borzucuk<sup>1</sup>, Han K. Kim<sup>2</sup>, Hilary A. Yegen<sup>2</sup>, Richard A. Friedman<sup>3,4</sup>, Charles A.  
Powell<sup>2,4</sup>

<sup>1</sup>Department of Pathology, <sup>2</sup>Department of Medicine, <sup>3</sup>Department of Biomedical  
Informatics, <sup>4</sup>Herbert Irving Comprehensive Cancer Center

Columbia University College of Physicians & Surgeons, New York, New York, USA

**Figure Legend**

**Figure E1. *TGF $\beta$ RII* RT PCR (left panel).** Tumor RNA from Invasive (n=6), AC-mixed subtype (n=9), and BAC (n=5) that were examined by microarray analysis were analyzed by quantitative realtime PCR, normalized to 18S. Each bar represents the mean normalized *TGF $\beta$ RII* copy number  $\pm$  SEM for experiments performed in triplicate. The Pearson correlation coefficient for the relation between microarray expression data and realtime PCR data was .59, P <.004. **T $\beta$ RII Western Analysis (right panel).** Tumor homogenates from Invasive (n=3), AC-mixed subtype (n=4), and BAC (n=3) were examined by Western analysis with results normalized to  $\beta$ -Actin.

**Figure E2. Immunocytochemical staining for T $\beta$ RII.** Immunofluorescence was performed on cells transfected with siRNA or negative control that were grown on glass cover slips for 48 hours. T $\beta$ RII staining was predominantly restricted to the cytoplasmic membrane and was diminished in knocked-down cells.

**Figure E1**

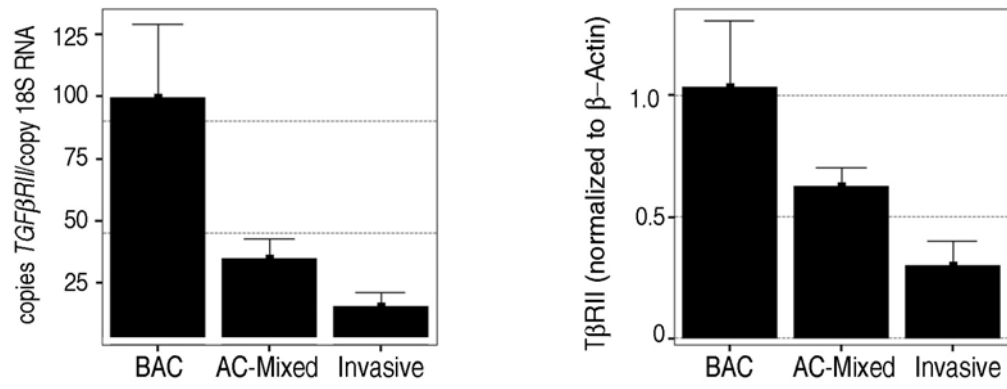

**Figure E2**

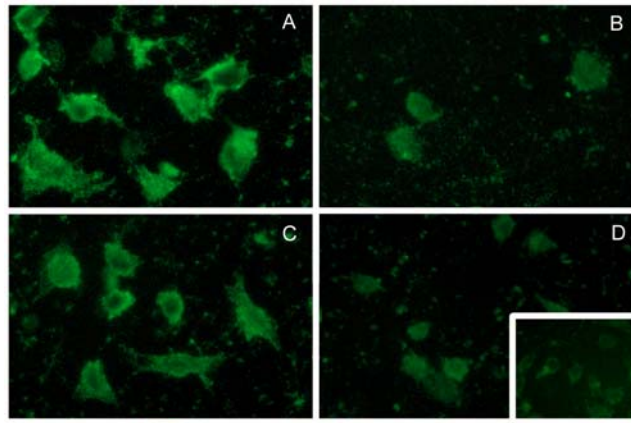

Supplement: supp_172_6_729__1.pdf [file supp_172_6_729__1.pdf]
